# Supplementary material for: Validation of reference genes for gene expression analysis in olive (Olea europaea) mesocarp tissue by quantitative real-time RT-PCR
Source: PubMed Central journal article supplement (PMC4062307; doi:10.1186/1756-0500-7-304), 2014-05-18

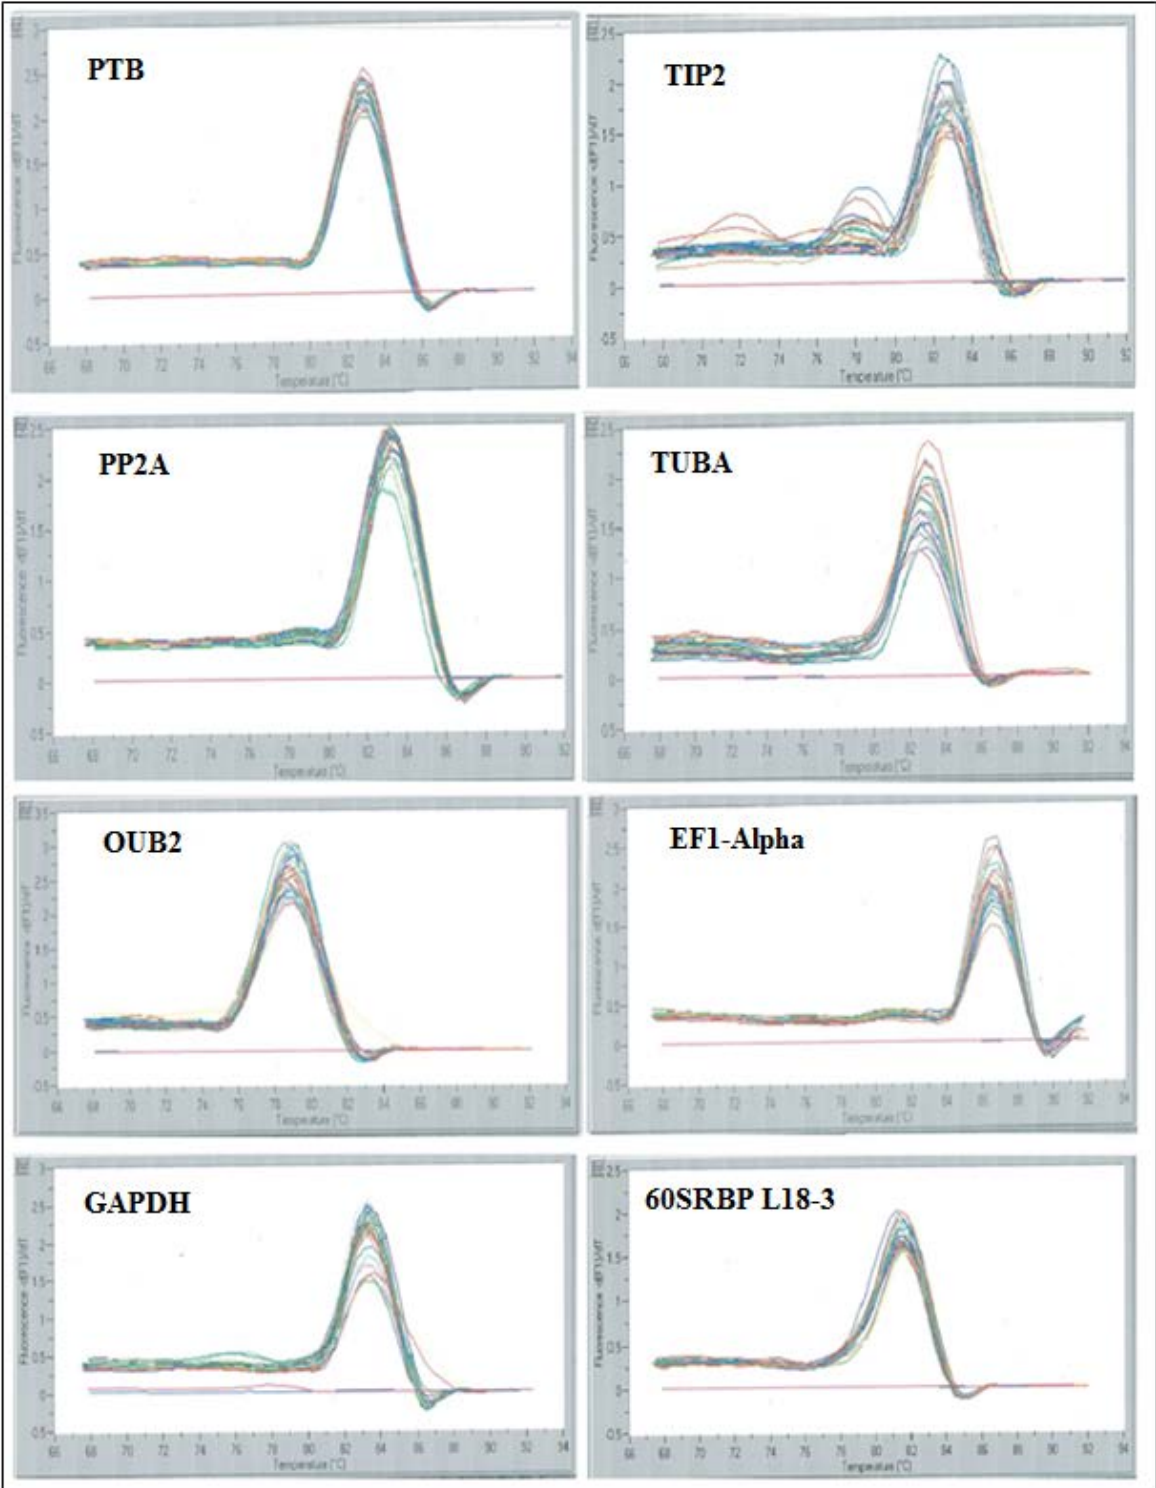

Supplement: 1756-0500-7-304-S3.pdf [file 1756-0500-7-304-S3.pdf]
